# Supplementary material for: Characterization of an African Swine Fever Virus Field Isolate from Vietnam with Deletions in the Left Variable Multigene Family Region
Source: MDPI journal article supplement (doi:10.3390/v16040571), 2024-04-07
Supplement: s1 [file s1]

| ASFV Georgia 2007/1 - Dilution | MGF 360-14L | Tignon |
|--------------------------------|-------------|--------|
| Undiluted                      | 25.51       | 25.63  |
| 10 <sup>-1</sup>               | 28.54       | 28.93  |
| 10 <sup>-2</sup>               | 31.44       | 32.51  |
| 10 <sup>-3</sup>               | 35.84       | 36.94  |
| 10 <sup>-4</sup>               | 37.45       | -      |
| 10 <sup>-5</sup>               | -           | -      |
| 10 <sup>-6</sup>               | -           | -      |
| NTC                            | -           | -      |

**Table S1. Sensitivity of MGF 360-14L real-time PCR compared to that of Tignon real-time PCR assay.** Total nucleic acid extracted from cell culture amplified ASFV Georgia 2007/1 ten-fold dilutions, was tested by the MGF 360-14L and Tignon real-time PCR assays. 2007/1.

| Sample                    | MGF 360-14L | Tignon | β-Actin |
|---------------------------|-------------|--------|---------|
| DPI 9 P1                  | -           | 25.71  | 20.37   |
| DPI 9 P2                  | -           | 31.69  | 22.30   |
| DPI 9 P3                  | -           | 32.47  | 20.06   |
| DPI 9 P4                  | -           | 35.36  | 22.36   |
| DPI 9 P5                  | -           | -      | 19.82   |
| DPI 9 P6                  | -           | 35.28  | 21.92   |
| DPC 0 P2                  | -           | 38.84  | 25.47   |
| DPC 0 P3                  | -           | -      | 23.86   |
| DPC 0 P4                  | -           | 38.50  | 25.34   |
| DPC 0 P5                  | -           | 38.45  | 24.53   |
| DPC 0 P6                  | -           | -      | 24.20   |
| DPC 4 P2                  | -           | 38.43  | 25.23   |
| DPC 4 P3                  | -           | -      | 22.59   |
| DPC 4 P4                  | -           | -      | 22.48   |
| DPC 4 P5                  | -           | -      | 24.40   |
| DPC 4 P6                  | -           | -      | 24.21   |
| DPC 7 P2                  | -           | -      | 24.19   |
| DPC 7 P3                  | -           | -      | 24.16   |
| DPC 7 P4                  | -           | -      | 23.27   |
| DPC 7 P5                  | -           | 39.32  | 22.34   |
| DPC 7 P6                  | -           | -      | 23.60   |
| DPC 15 P2                 | -           | -      | 21.67   |
| DPC 15 P3                 | -           | 39.20  | 21.19   |
| DPC 15 P4                 | -           | -      | 21.48   |
| DPC 15 P5                 | -           | -      | 20.30   |
| DPC 15 P6                 | -           | -      | 21.42   |
| DPC 21 P2                 | -           | -      | 21.69   |
| DPC 21 P3                 | -           | -      | 21.67   |
| DPC 21 P4                 | -           | -      | 21.40   |
| DPC 21 P5                 | -           | 37.38  | 21.12   |
| DPC 21 P6                 | -           | -      | 21.87   |
| DPC 6 P7                  | 18.47       | 20.34  | 23.71   |
| EC                        | -           | -      | -       |
| NTC                       | -           | -      | -       |
| ASFV-GUS-Vietnam Inoculum | -           | 24.25  | 31.26   |
| ASFV Georgia 2007/1       | 25.41       | 26.19  | 30.81   |

**Table S2. Detection of ASFV MGF 360-14L in whole blood samples collected from pigs ON inoculated with ASFV-GUS-Vietnam and challenged with ASFV Georgia 2007/1 IM.** DPI= days post infections with ASFV-GUS-Vietnam. Tignon RT-PCR detects p72 gene that is present in both ASFV Georgia 2007/1 and ASFV-GUS-Vietnam. ASFV MGF 360-14L is present only in ASFV Georgia 2007/1. EC= extraction control. NTC= non-template control. DPI= days post infection. . DPC= days post challenge.

| Sample                     | MGF 360-14L | Tignon | $\beta$ -Actin |
|----------------------------|-------------|--------|----------------|
| DPI 9 P1                   | -           | 33.70  | 24.54          |
| DPI 9 P2                   | -           | 33.09  | 25.32          |
| DPI 9 P3                   | -           | 39.17  | 26.46          |
| DPI 9 P4                   | -           | 37.46  | 29.29          |
| DPI 9 P5                   | -           | -      | 27.50          |
| DPI 9 P6                   | -           | 33.33  | 29.44          |
| DPC 0 P2                   | -           | -      | 29.71          |
| DPC 0 P3                   | -           | -      | 28.94          |
| DPC 0 P4                   | -           | 38.11  | 29.41          |
| DPC 0 P5                   | -           | -      | 29.14          |
| DPC 0 P6                   | -           | -      | 32.36          |
| DPC 4 P2                   | -           | -      | 30.01          |
| DPC 4 P3                   | -           | -      | 28.83          |
| DPC 4 P4                   | -           | -      | 28.73          |
| DPC 4 P5                   | -           | -      | 30.27          |
| DPC 4 P6                   | -           | -      | 29.55          |
| DPC 7 P2                   | -           | 38.00  | 30.43          |
| DPC 7 P3                   | -           | 38.22  | 30.09          |
| DPC 7 P4                   | 33.54*      | 36.15  | 28.42          |
| DPC 7 P5                   | -           | -      | 29.69          |
| DPC 7 P6                   | -           | -      | 30.40          |
| DPC 15 P2                  | -           | -      | 28.33          |
| DPC 15 P3                  | -           | -      | 28.16          |
| DPC 15 P4                  | -           | 33.04  | 28.68          |
| DPC 15 P5                  | -           | -      | 30.65          |
| DPC 15 P6                  | -           | -      | 29.18          |
| DPC 21 P2                  | -           | -      | 29.97          |
| DPC 21 P3                  | -           | -      | 28.12          |
| DPC 21 P4                  | -           | 36.08  | 28.57          |
| DPC 21 P5                  | -           | -      | 28.71          |
| DPC 21 P6                  | -           | -      | 29.46          |
| DPC 4 P7                   | 26.13       | 26.60  | 28.94          |
| EC                         | -           | -      | -              |
| NTC                        | -           | -      | -              |
| ASFV- GUS-Vietnam Inoculum | -           | 22.36  | 30.25          |
| ASFV Georgia 2007/1        | 25.18       | 24.79  | 28.73          |

**Table S3. Detection of ASFV MGF 360-14L in OPSW samples collected from pigs ON inoculated with ASFV-GUS-Vietnam and challenged IM with ASFV Georgia 2007/1.** Tignon RT-PCR detects p72 gene that is present in both ASFV Georgia 2007/ and ASFV-GUS-Vietnam. ASFV MGF 360-14L is present only in ASFV Georgia 2007/1. \* Low levels of was detected in one OPSW sample. EC= extraction control. NTC= non-template control. DPI= days post infection. . DPC= days post challenge.

| Sample                    | MGF 360-14L | Tignon | β-Actin |
|---------------------------|-------------|--------|---------|
| Spleen P1*                | -           | 19.09  | 22.06   |
| Spleen P2                 | -           | -      | 21.45   |
| Spleen P3                 | -           | 38.32  | 20.33   |
| Spleen P4                 | -           | -      | 21.15   |
| Spleen P5                 | -           | -      | 21.03   |
| Spleen P6                 | -           | -      | 19.76   |
| SILN P1*                  | -           | 27.08  | 23.50   |
| SILN P2                   | -           | -      | 32.27   |
| SILN P3                   | -           | -      | 26.23   |
| SILN P4                   | -           | 37.21  | 27.24   |
| SILN P5                   | -           | 35.72  | 22.22   |
| SILN P6                   | -           | -      | 24.26   |
| EC                        | -           | -      | -       |
| NTC                       | -           | -      | -       |
| ASFV-GUS-Vietnam Inoculum | -           | 23.74  | 31.36   |
| ASFV Georgia 2007/1       | 25.21       | 25.75  | 30.10   |

**Table S4. Detection of ASFV MGF 360-14L in lymphoid tissues collected from pigs ON inoculated with ASFV-GUS-Vietnam and challenged IM with ASFV Georgia 2007/1.** Tignon RT-PCR detects p72 gene that is present in both ASFV Georgia 2007/ and ASFV-GUS-Vietnam. ASFV MGF 360-14L is present only in ASFV Georgia 2007/1. EC= extraction control. NTC= non-template control. SILN = superficial inguinal lymph node. DPI= days post infection. DPC= days post challenge. Note= \* P1 that succumbed to ASF shows the highest viral load in spleen and SILN.

| Sample                    | MGF   | Tignon | β-Actin |
|---------------------------|-------|--------|---------|
| DPI 9 P9                  | -     | 28.20  | 20.47   |
| DPI 9 P10                 | -     | 38.13  | 21.73   |
| DPI 9 P11                 | -     | 32.98  | 19.71   |
| DPI 9 P12                 | -     | 28.16  | 20.42   |
| DPI 9 P13                 | -     | -      | 22.09   |
| DPI 9 P14                 | -     | -      | 20.69   |
| DPC -1 P9                 | -     | 34.58  | 21.55   |
| DPC -1 P10                | -     | -      | 20.24   |
| DPC -1 P11                | -     | 38.35  | 20.04   |
| DPC -1 P12                | -     | 37.95  | 19.99   |
| DPC -1 P13                | -     | 36.20  | 21.22   |
| DPC 4 P9                  | -     | 35.00  | 22.77   |
| DPC 4 P10                 | -     | -      | 22.04   |
| DPC 4 P11                 | -     | -      | 21.69   |
| DPC 4 P12                 | -     | 37.15  | 21.26   |
| DPC 4 P13                 | -     | 35.94  | 22.32   |
| DPC 7 P9                  | -     | 36.67  | 20.45   |
| DPC 7 P10                 | -     | -      | 21.81   |
| DPC 7 P11                 | -     | -      | 22.07   |
| DPC 7 P12                 | -     | -      | 21.88   |
| DPC 7 P13                 | -     | 34.58  | 21.51   |
| DPC 14 P9                 | -     | 34.72  | 20.76   |
| DPC 14 P10                | -     | -      | 21.90   |
| DPC 14 P11                | -     | -      | 22.52   |
| DPC 14 P12                | -     | 37.08  | 22.37   |
| DPC 14 P13                | -     | 34.78  | 21.42   |
| DPC 25 P9                 | -     | 36.15  | 21.00   |
| DPC 25 P10                | -     | -      | 22.50   |
| DPC 25 P11                | -     | -      | 22.38   |
| DPC 25 P12                | -     | 38.42  | 23.19   |
| DPC 25 P13                | -     | -      | 22.48   |
| EC                        | -     | -      | -       |
| NTC                       | -     | -      | -       |
| ASFV-Gus-Vietnam Inoculum | -     | 24.19  | 31.16   |
| ASFV Georgia 2007/1       | 24.72 | 25.56  | 30.11   |

**Table S5. Detection of ASFV MGF 360-14L in whole blood collected from pigs IM inoculated with ASFV-GUS-Vietnam and challenged ON with ASFV Georgia 2007/1.** Tignon RT-PCR detects p72 gene that is present in both ASFV Georgia 2007/ and ASFV-GUS-Vietnam. ASFV MGF 360-14L is present only in ASFV Georgia 2007/1. EC= extraction control. NTC= non-template control. DPI= days post infection. DPC= days post challenge.

| Samples                  | MGF 360-14L | Tignon | β-Actin |
|--------------------------|-------------|--------|---------|
| DPI 13 P9                | -           | 25.09  | 28.20   |
| DPI 13 P10               | -           | 37.15  | 29.77   |
| DPI 13 P11               | -           | 32.61  | 29.18   |
| DPI 13 P12               | -           | 27.87  | 29.62   |
| DPI 13 P13               | -           | 36.10  | 29.03   |
| DPI 13 P14               | -           | 33.97  | 27.94   |
| DPC -1 P9                | -           | -      | 29.10   |
| DPC -1 P10               | -           | -      | 28.79   |
| DPC -1 P11               | -           | 29.38  | 28.66   |
| DPC -1 P12               | -           | -      | 28.37   |
| DPC -1 P13               | -           | 24.01  | 28.45   |
| DPC 4 P9                 | -           | -      | 27.97   |
| DPC 4 P10                | -           | -      | 30.66   |
| DPC 4 P11                | -           | 31.46  | 27.86   |
| DPC 4 P12                | -           | 34.13  | 28.22   |
| DPC 4 P13                | -           | 26.53  | 27.62   |
| DPC 7 P9                 | -           | -      | 25.58   |
| DPC 7 P10                | -           | -      | 29.09   |
| DPC 7 P11                | -           | 30.86  | 25.37   |
| DPC 7 P12                | -           | -      | 28.20   |
| DPC 7 P13                | -           | 28.02  | 27.69   |
| DPC 14 P9                | -           | -      | 30.05   |
| DPC 14 P10               | -           | -      | 28.97   |
| DPC 14 P11               | -           | 33.54  | 27.75   |
| DPC 14 P12               | -           | -      | 29.33   |
| DPC 14 P13               | -           | 29.53  | 28.98   |
| DPC 25 P9                | -           | -      | 29.52   |
| DPC 25 P10               | -           | -      | 28.72   |
| DPC 25 P11               | -           | 30.17  | 26.15   |
| DPC 25 P12               | -           | -      | 27.54   |
| DPC 25 P13               | -           | -      | 35.48   |
| EC                       | -           | -      | -       |
| NTC                      | -           | -      | -       |
| ASF Georgia 2007/1       | 25.46       | 25.52  | 31.04   |
| ASF GUS Vietnam Inoculum | -           | 27.97  | 33.29   |

**Table S6. Detection of ASFV MGF 360-14L in OPSW samples collected from pigs IM inoculated with ASFV-GUS-Vietnam and challenged ON with ASFV Georgia 2007/1.** Tignon RT-PCR detects p72 gene that is present in both ASFV Georgia 2007/ and ASFV-GUS-Vietnam. ASFV MGF 360-14L is present only in ASFV Georgia 2007/1. EC=extraction control. NTC= non-template control. DPI= days post infection. DPC= days post challenge.

|                            | MGF 360-14L | Tignon | β- actin |
|----------------------------|-------------|--------|----------|
| Spleen P9                  | -           | 36.07  | 17.54    |
| Spleen P10                 | -           | -      | 17.87    |
| Spleen P11                 | -           | -      | 19.83    |
| Spleen P12                 | -           | -      | 19.85    |
| Spleen P13                 | -           | 38.51  | 19.32    |
| Spleen P14                 | -           | 19.40  | 19.31    |
| SILN P9                    | -           | -      | 23.97    |
| SILN P10                   | -           | -      | 23.19    |
| SILN P11                   | -           | -      | 21.21    |
| SILN P12                   | -           | 35.14  | 22.79    |
| SILN P13                   | -           | 38.17  | 21.06    |
| SILN P14                   | -           | 21.21  | 20.03    |
| Tonsil P11                 | -           | 31.68  | 21.36    |
| Tonsil P13                 | -           | 32.51  | 21.26    |
| Tonsil P14                 | -           | 28.43  | 22.44    |
| SMLN P11                   | -           | 33.23  | 21.52    |
| SMLN P14                   | -           | 26.57  | 20.96    |
| GHLN P12                   | -           | 35.6   | 21.57    |
| GHLN p13                   | -           | 28.97  | 21.89    |
| GHLN P14                   | -           | 22.22  | 21.97    |
| EC                         | -           | -      | -        |
| NTC                        | -           | -      | -        |
| ASF Georgia 2007/1         | 22.84       | 23.37  | 28.32    |
| ASFV- GUS-Vietnam Inoculum | -           | 22.25  | 29.26    |

**Table S7. Detection of ASFV MGF 360-14L in lymphoid tissues collected from pigs IM inoculated with ASFV-GUS-Vietnam and challenged ON with ASFV Georgia 2007/1.** Tignon RT-PCR detected p72 gene that is present in both ASFV Georgia 2007/1 and ASFV-GUS-Vietnam. ASFV MGF 360-14L is present only in ASFV Georgia 2007/1. EC = extraction control. NTC= non-template control. DPI = days post-infection. SMLN = sub-mandibular lymph node. GHLN = gastro-hepatic lymph node. SILN = superficial inguinal lymph node. Note: Only Tignon assay positive tonsil, SMLN, and GHLN were tested by MGF 360-14L RT-PCR. P14 = the contact pig that succumbed to ASF.

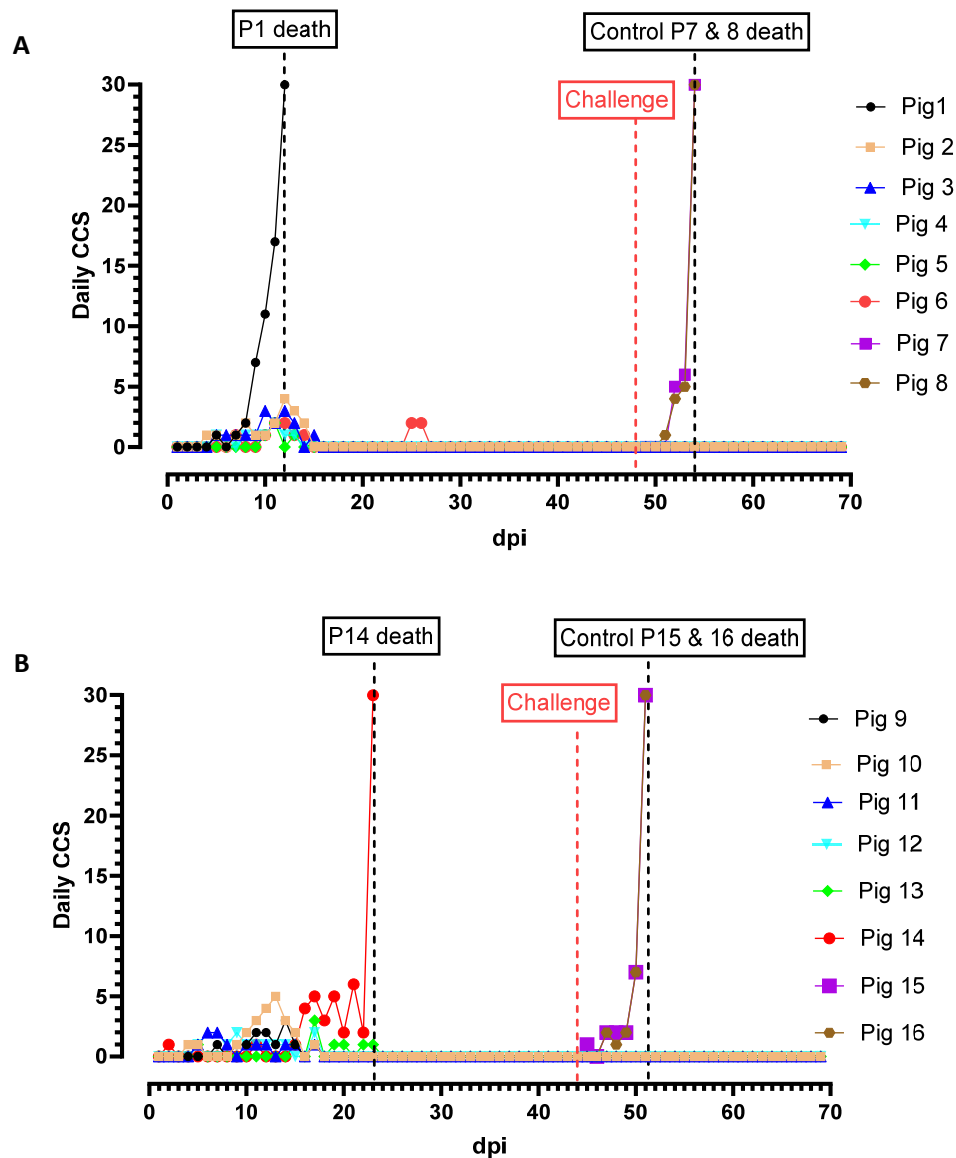

**Figure S1: Daily cumulative clinical scores (CCS) of the pig # 1-8 (A) and pig # 9-16 (B).** Pig # 1-6 were inoculated with ASFV-GUS-Vietnam ON followed by ASFV Georgia 2007/1 challenge IM. The breed and age matched control pigs (# 7 and 8) were challenged with ASFV Georgia 2007/1 IM. Pigs # 9 – 14 were inoculated with ASFV-GUS-Vietnam virus IM and challenged with ASFV Georgia 2007/1 ON. The breed and age matched control pig # 15 and 16, were challenged with ASFV Georgia 2007/1 ON. When a pig reached the humane end point or found dead, the highest possible CCS of 30 was assigned. dpi = days post-infection
